# Supplementary material
Source: PubMed Central journal article supplement (PMC11626442)
Supplement: NIHMS2036541-supplement-Supplementary_Material.pdf [file NIHMS2036541-supplement-Supplementary_Material.pdf]

## Supplementary Note: clinical histories

### P1

P1 was first seen at the Clinical Center of the National Institutes of Health as a 14-year-old boy with a significant history of recurrent fever, parotitis, joint inflammation and colitis. At age 4, he started having episodes of recurrent fever with severe painful parotid gland swelling, lymphadenopathy and hepatosplenomegaly. At age 8, he developed pain and swelling of his ankle and knee joints, which progressively worsened to polyarthritis affecting the atlantoaxial, sacroiliac, and multiple other joints. He had frequent loose stools and two episodes of hematochezia. He did not present with any skin rash, and his skin biopsy for dermal fibroblast culture did not reveal histological evidence of inflammation. Given his clinical history, he had been diagnosed with polyarticular juvenile idiopathic arthritis or chronic recurrent multifocal osteomyelitis. His treatment included glucocorticoids and methotrexate, without much improvement.

On initial examination at the National Institutes of Health at age 14, he was wheelchair-dependent and had prominent painful swelling of the left ankle joint. Magnetic resonance imaging scan detected high intensities in his ankle and atlantoaxial joints suggestive of active joint inflammation. Synovial fluid aspiration demonstrated marked leukocytosis with neutrophil predominance; cultures were negative. Colon biopsy showed dense infiltration of lymphocytes and neutrophils in crypts and the lamina propria, whereas liver biopsy showed diffuse glycogen deposition in the absence of inflammatory cell infiltrate. This histopathology contrasts with *Sharpin*-deficient mice, which display significant eosinophilic esophagitis and focal periportal liver inflammation. Muscle biopsy was not performed due to the absence of myopathic clinical features. At age 16, the patient presented with moderate conductive hearing loss associated with chronic group A streptococcal otitis media. Despite initial tympanostomy tube drainage and adenoidectomy his ear infection persisted, which necessitated tympanoplasty surgery at age 21. No hypogammaglobulinemia (IgG: 1506 mg/dL; IgA: 303 mg/dL; IgM: 243 mg/dL), or deficit in IgG subclasses (IgG1 717 mg/dL; IgG2: 508 mg/dL; IgG3: 79.3 mg/dL; IgG4: 49.4 mg/dL) was observed, and no autoantibodies were detected. Immunophenotyping of leukocyte surface markers also did not show major abnormalities (Supplementary Data Table 1). Vaccine responses against PCV-13, VZV, HiB, diphtheria and tetanus were all positive (Supplementary Data Table 2). No family history was noted.

### P2

P2 was born to non-consanguineous parents of Iranian origin. No family history was noted. She had prolonged jaundice until day 40, and a blood count at that time revealed neutropenia (absolute neutrophil count: 493 cells/ $\mu$ l), which resolved later during the first year of life. No infectious episodes were noted. At five months, the infant had her first unprovoked febrile episode, accompanied by lymphadenopathy and vomiting, without a specific infectious source. The episodes of fever repeated every 12 to 20 days and lasted for 3 to 4 days. The initial diagnosis was PFAPA, and prednisolone during fever episodes was initiated, and subsequently switched to daily cimetidine, colchicine, and dexamethasone. During the febrile episodes, there was a left shift of neutrophils, monocytosis, and elevated ESR and CRP levels. Low IgG level was observed at 8 months (IgG: 401 mg/dL; IgA: 30 mg/dL; IgM: 44 mg/dL), which was normalized at age 2. The response to tetanus and

hepatitis B vaccines was positive. She never had a rash, hepatosplenomegaly, or arthritis. No muscle weakness was noted. The patient had normal development, and ophthalmologic examinations were normal. The cardiac evaluation was normal except for mild mitral valve prolapse. Genetic analysis for mutations in the MEFV gene showed a heterozygous E148Q variant, and colchicine replaced cimetidine. No response was seen during one year of its use.

At age 4, she experienced fever associated with a reduced level of consciousness and was hospitalized. She had leukocytosis with a left shift and an elevation in CRP, ferritin, and D-dimer. Brain CT scan and cardiac evaluation were normal. With a provisional diagnosis of macrophage activation syndrome (MAS) or multisystem inflammatory syndrome in children (MIS-C), she received IVIg and pulsed methylprednisolone. The patient became conscious and afebrile and was discharged on prednisolone after four days. Weekly etanercept was added to her treatment. Three months later, however, she developed a high fever and decreased level of consciousness for the second time. She was kept at home and, after eight hours, transferred to the hospital, where she suffered respiratory and cardiac arrest. Resuscitation was unsuccessful. An infectious cause including SARS-CoV2 was suspected, although infectious disease workup was not performed. No autopsy was conducted.

## Supplementary Data Table 1. Peripheral blood lymphocyte surface markers

|                       |                       | SHARPIN Pt (14yo) |       |      | HOIP Pt (7yo) |       |         | Normal range |          |
|-----------------------|-----------------------|-------------------|-------|------|---------------|-------|---------|--------------|----------|
|                       |                       | %                 | Count |      | %             | Count |         | %            | Count    |
| <b>Total T Cells</b>  | CD3                   | 80.4              | 2307  | High | 77.9          | 1799  |         | 60.0-83.7    | 714-2266 |
| <b>T cell subsets</b> | CD4/CD3               | 51.1              | 1467  |      | 53.8          | 1243  |         | 31.9-62.2    | 359-1565 |
|                       | CD8/CD3               | 25.2              | 723   |      | 19            | 439   |         | 11.2-34.8    | 178-853  |
|                       | CD4/CD8 ratio         | 2.03              |       |      | 2.83          |       |         | 1.11-5.17    |          |
|                       | CD3+CD4-/CD8-         | 3.1               | 89    |      | 4.8           | 111   |         | 1.3-9.2      | 18-185   |
|                       | CD4/CD3/CD62+/CD45RA+ | 15.2              | 436   |      | 28.8          | 665   |         | 7.6-37.7     | 102-1041 |
|                       | CD4/CD3/CD62+/CD45RA- | 27.4              | 788   | High | 17            | 393   |         | 10.4-30.7    | 162-614  |
|                       | CD4/CD3/CD62-/CD45RA- | 8.4               | 241   | High | 5.4           | 125   |         | 2.3-15.6     | 42-225   |
|                       | CD4/CD3/CD62-/CD45RA+ | 0.2               | 6     |      | 2.5           | 58    | High    | 0-1.5        | 0-29     |
|                       | CD8/CD3/CD62+/CD45RA+ | 12.9              | 370   |      | 11.6          | 268   |         | 5.7-19.7     | 85-568   |
|                       | CD8/CD3/CD62+/CD45RA- | 6.2               | 178   |      | 3.1           | 72    |         | 1.5-10.3     | 25-180   |
|                       | CD8/CD3/CD62-/CD45RA- | 3.7               | 106   |      | 2.4           | 55    |         | 1.1-9.2      | 24-175   |
|                       | CD8/CD3/CD62-/CD45RA+ | 2.3               | 66    |      | 1.9           | 44    |         | 0.7-7.8      | 11-172   |
|                       | CD3/CD4/CD31/CD45RA   | 8.7               | 251   |      | 25.7          | 593   | High    | 1.6-20.2     | 34-426   |
|                       | CD3/CD4/CD45RA-/CXCR5 | 4.8               | 138   |      | 4.5           | 104   |         | 1.8-8.9      | 35-172   |
| CD3/CD8/CD57          | NA                    | NA                |       | 3.2  | 74            |       | <16.2   | <397         |          |
| CD3/CD4/CD25/FoxP3    | 1.9                   | 55                |       | 1    | 23            | Low   | 1.6-4.3 | 25-89        |          |
| <b>B cell subsets</b> | CD20                  | 13.3              | 382   | High | 17.5          | 404   | High    | 3.0-19.0     | 59-329   |
|                       | CD19                  | 13.3              | 382   | High | 17.5          | 404   | High    | 3.3-19.3     | 61-321   |
|                       | CD20/CD27             | 2.1               | 60    |      | 0.2           | 5     | Low     | 0.8-3.6      | 13-68    |
|                       | CD20/CD38             | 13.1              | 377   | High | 16.9          | 390   | High    | 1.2-17.6     | 30-282   |
|                       | CD20/CD10             | 7.7               | 220   | High | 4.3           | 100   |         | 0.6-6.0      | 13-127   |
|                       | CD20/IgM-/CD38++      | 0.1               | 3     |      | 0             | 0     |         | 0-0.1        | 0-2      |
|                       | CD20/IgM+/CD10+       | 2.9               | 83    | High | 2.5           | 58    |         | 0.1-2.8      | 2.0-60   |
|                       | CD20/CD38+/CD10+      | 3                 | 86    | High | 2.4           | 55    |         | 0.1-2.7      | 0-63     |
|                       | CD20/CD27+/IgM+       | 0.6               | 17    |      | 0.1           | 2     | Low     | 0.3-2.5      | 6.0-50   |
|                       | CD20/CD27+/IgM-       | 1.3               | 37    |      | 0.1           | 2     | Low     | 0.3-2.2      | 6.0-43   |
|                       | CD19/CD24hi/CD38hi    | 2.9               | 83    | High | 2.5           | 58    | High    | 0.3-2.2      | 6.0-48   |
|                       | CD19/CD24-/CD38++     | 0.6               | 17    | High | 0.1           | 2     |         | 0-0.3        | 0-8      |
|                       | CD19/CD21low/CD38low  | 0.1               | 3     |      | 0.1           | 2     |         | 0.1-0.8      | 1.0-16   |
|                       | <b>NK Cells</b>       | CD16+orCD56+/CD3- | 6     | 172  | Low           | 4.7   | 109     | Low          | 6.2-34.6 |
| CD16+orCD56+/CD3+     |                       | 10                | 287   |      | 6.5           | 150   |         | 2.2-12.4     | 29-299   |

## Supplementary Data Table 2. Vaccine responses

| PCV-13*                     | SHARPIN P1 |                |                          |
|-----------------------------|------------|----------------|--------------------------|
|                             | Pre        | Post (4-weeks) | 2-fold increase          |
| Serotype 1                  | N/A**      | N/A**          | N/A**                    |
| Serotype 3                  | 0.4        | 1.3            | (+)                      |
| Serotype 4                  | 2.4        | 10.6           | (+)                      |
| Serotype 5                  | 1.5        | 2.1            | (-)                      |
| Serotype 14                 | 8.8        | 8.7            | (-)                      |
| Serotype 19F                | 4.5        | 15.2           | (+)                      |
| Serotype 23F                | 14.8       | 17.2           | (-)                      |
| Serotype 6B                 | 0.3        | 3.5            | (+)                      |
| Serotype 7F                 | 6.6        | 3.5            | (-)                      |
| Serotype 18C                | 0.3        | 0.8            | (+)                      |
| Serotype 19A                | 0.4        | 5.6            | (+)                      |
| Serotype 9V                 | 7.4        | 28.5           | (+)                      |
| <b>2-fold increase rate</b> |            |                | <b>63% (positive)***</b> |

\* Note that serotype 6A was not included in the assessment.

\*\* Serotype 1 was not quantitated due to technical reasons.

\*\*\* Antibody concentrations increased by 2-fold or greater for at least 50% of serotypes when comparing the pre- and post-vaccination results.

|                               | SHARPIN P1 | Cutoff |                 |
|-------------------------------|------------|--------|-----------------|
| <b>VZV IgG (index)</b>        | 343        | 165    | <b>Positive</b> |
| <b>HiB IgG (mg/L)</b>         | >9.00      | 0.15   | <b>Positive</b> |
| <b>Diphtheria IgG (IU/ml)</b> | 0.03       | 0.01   | <b>Positive</b> |
| <b>Tetanus IgG (IU/ml)</b>    | 0.48       | 0.01   | <b>Positive</b> |

Supplementary Data Table 3: inborn errors of cell death (IECD)

|                            | Autoinflammation                                                      | Immunodeficiency                                    | Immunophenotype                                                               | Cell Death                   | Mouse phenotype                                     | Treatment               |
|----------------------------|-----------------------------------------------------------------------|-----------------------------------------------------|-------------------------------------------------------------------------------|------------------------------|-----------------------------------------------------|-------------------------|
| Sharpenia                  | Fever<br>Parotitis<br>Arthritis<br>GI inflammation<br>Growth failure  | Chronic otitis media<br>by group A<br>streptococcus | Abnormalities in germinal<br>center development                               | Apoptosis<br>(> Necroptosis) | Dermatitis                                          | Anti-TNF                |
| HOIP deficiency            | Fever<br>Arthritis<br>GI inflammation<br>Dermatitis<br>Growth failure | Viral encephalitis<br>Skin abscesses<br>Sepsis      | Hypogammaglobulinemia<br>Low T cells<br>Low memory B cells<br>Vaccine failure | Apoptosis<br>(> Necroptosis) | Embryonic lethal                                    | Anti-TNF<br>IVIG        |
| HOIL-1 deficiency          | Fever<br>GI inflammation<br>Dermatitis<br>Growth failure              | Sepsis<br>Meningitis                                | Hypogammaglobulinemia<br>Low memory B cells<br>Vaccine failure                | Apoptosis<br>(> Necroptosis) | Embryonic lethal                                    | Corticosteroids<br>HSCT |
| RELA<br>haploinsufficiency | Fever<br>GI inflammation<br>Dermatitis<br>Arthritis                   | No                                                  | (*)                                                                           | Apoptosis                    | Exacerbation in<br>inducible models<br>(**)         | Anti-TNF                |
| RIPK1 deficiency           | Fever<br>Dermatitis<br>GI inflammation<br>Growth failure              | Sepsis<br>Pneumonia<br>Skin abscesses<br>UTI        | Low T cells<br>Low memory B cells                                             | Apoptosis and<br>necroptosis | Neonatal lethal                                     | Anti-TNF<br>HSCT        |
| CRIA                       | Fever<br>Lymphadenopathy<br>GI inflammation                           | No                                                  | No major abnormalities                                                        | Apoptosis and<br>necroptosis | Embryonic lethal in<br>homozygous knock-<br>in mice | Anti-IL6                |

|                   |                                                                                         |       |                        |                          |                  |                  |
|-------------------|-----------------------------------------------------------------------------------------|-------|------------------------|--------------------------|------------------|------------------|
| Otulinopenia/ORAS | Fever<br>Panniculitis<br>GI inflammation<br>Sterile abscess formation<br>Growth failure | (***) | No major abnormalities | Apoptosis                | Embryonic lethal | Anti-TNF<br>HSCT |
| TBK1 deficiency   | Fever<br>Arthritis<br>Vasculitis<br>Basal ganglia calcification<br>Growth failure       | No    | No major abnormalities | Necroptosis (>apoptosis) | Embryonic lethal | Anti-TNF         |

\* One patient is noted to have CD4<sup>+</sup> T lymphoproliferation. \*\* TNF-induced dermatitis and dextran sulfate sodium (DSS)-induced colitis. \*\*\* Susceptibility to staphylococcal infections in haploinsufficient carriers of *OTULIN* mutations. Abbreviations; CRIA: cleavage-resistant RIPK1-induced autoinflammation; ORAS: otulin-related autoinflammatory syndrome; HSCT: hematopoietic stem cell transplantation, UTI: urinary tract infection.
